# Supplementary material for: The effects of Bacillus coagulans MTCC 5856 on functional gas and bloating in adults: A randomized, double-blind, placebo-controlled study
Source: PubMed Central journal article supplement (PMC9982755; doi:10.1097/md.0000000000033109), 2023-03-03
Supplement: medi-102-e33109-s001.pdf [file medi-102-e33109-s001.pdf]

1 **Table S1. Brain Fog questionnaire score**

| <b>PARAMETER</b>       | <b><i>B. coagulans</i></b><br><b>(N=33)</b> | <b>PLACEBO</b><br><b>(N=33)</b> |
|------------------------|---------------------------------------------|---------------------------------|
| <b>Screening visit</b> |                                             |                                 |
| Yes                    | 1 (3.03 %)                                  | 2 (6.06 %)                      |
| No                     | 32 (96.97 %)                                | 31 (93.94 %)                    |
| <b>Final visit</b>     |                                             |                                 |
| Yes                    | 1 (3.03 %)                                  | 2 (6.06 %)                      |
| No                     | 32 (96.97 %)                                | 31 (93.94 %)                    |

2

3 Brain Fog Questionnaire Score percentage was recorded on screening and final visit.

4

5

6

7

8

9

10

11

12

13

14

15

16

17

18
