# Supplementary material for: The effects of Bacillus coagulans MTCC 5856 on functional gas and bloating in adults: A randomized, double-blind, placebo-controlled study
Source: PubMed Central journal article supplement (PMC9982755; doi:10.1097/md.0000000000033109), 2023-03-03
Supplement: medi-102-e33109-s002.pdf [file medi-102-e33109-s002.pdf]

## Supplementary Results

**Table S2.** Display of Adverse Events for one participant.

| <b>CATEGORY</b>                                | <b><i>B. coagulans</i><br/>Group<br/>(N=33)</b> | <b>PLACEBO Group<br/>(N=33)</b> | <b>Overall</b> |
|------------------------------------------------|-------------------------------------------------|---------------------------------|----------------|
| <b>All Participant Subjects</b>                | 35                                              | 35                              | 70             |
| <b>Number of subjects with at least one AE</b> | 00                                              | 01                              | 01             |
| <b>Subject Discontinuation due to AE</b>       | 00                                              | 00                              | 00             |
| <b>Subject with SAE or Death</b>               | 00                                              | 00                              | 00             |

Only one subject reported the adverse event in *B. coagulans* group. A list of adverse events experienced by study subjects in active group are provided.
