# Supplementary material for: The effects of Bacillus coagulans MTCC 5856 on functional gas and bloating in adults: A randomized, double-blind, placebo-controlled study
Source: PubMed Central journal article supplement (PMC9982755; doi:10.1097/md.0000000000033109), 2023-03-03
Supplement: medi-102-e33109-s004.pdf [file medi-102-e33109-s004.pdf]

## Supplementary Results

Table S4. Biochemical parameters.

| PARAMETER                         | <i>B. coagulans</i> (N=33) |               | Placebo (N=33) |               |
|-----------------------------------|----------------------------|---------------|----------------|---------------|
|                                   | Screening                  | Final Visit   | Screening      | Final Visit   |
| <b>Total Bilirubin(mg/dL)</b>     | 0.67 ±0.28                 | 0.67 ±0.25    | 0.73 ± 0.41    | 0.80 ± 0.35   |
| <b>Alkaline Phosphatase (U/L)</b> | 76.28 ±31.32               | 84.78 ±15.67  | 74.95 ±18.87   | 84.16 ±18.90  |
| <b>AST (IU/L)</b>                 | 19.42 ±5.30                | 20.30 ± 5.47  | 20.29 ± 9.40   | 21.83 ± 4.79  |
| <b>AST (IU/L)</b>                 | 18.99 ±7.78                | 21.61± 7.43   | 24.45 ± 16.49  | 24.32 ± 10.11 |
| <b>eGFR</b>                       | 93.42±22.52                | 91.20 ± 21.73 | 91.20±27.32    | 84.69 ± 25.22 |
| <b>Urea (mg/dL)</b>               | 21.23± 9.28                | 20.31± 7.32   | 22.43 ± 5.70   | 21.32± 5.95   |
| <b>Uric Acid (mg/dL)</b>          | 4.11 ± 1.47                | 30.71(3.07)   | 4.35 ±1.20     | 31.45 (3.21)  |
| <b>Serum Creatinine (mg/dL)</b>   | 1.79±4.81                  | 0.82±0.16*    | 0.81±0.19      | 0.87±0.17     |
| <b>Sodium (mmol/L)</b>            | 132.84 ± 23.27             | 138.67 ± 2.67 | 137.06 ± 2.41  | 138.94 ± 3.21 |
| <b>Potassium (mmol/L)</b>         | 4.40±0.45                  | 4.33±0.40     | 4.70±1.78      | 4.37±0.43     |
| <b>Chloride (mmol/L)</b>          | 100.49±2.56                | 100.52±2.76   | 100.27±2.34    | 101.98±3.08   |

Data represents the Mean± SD. None of the parameters showed any significant difference from baseline to end of the study in *B. coagulans* and the placebo groups.
