# Supplementary material for: The effects of Bacillus coagulans MTCC 5856 on functional gas and bloating in adults: A randomized, double-blind, placebo-controlled study
Source: PubMed Central journal article supplement (PMC9982755; doi:10.1097/md.0000000000033109), 2023-03-03
Supplement: medi-102-e33109-s005.pdf [file medi-102-e33109-s005.pdf]

## Supplementary Results

**Table S5 Urine analysis**

| PARAMETER                 | <i>B. coagulans</i> (N=33) |              | Placebo (N=33) |              |
|---------------------------|----------------------------|--------------|----------------|--------------|
|                           | Screening                  | Final Visit  | Screening      | Final Visit  |
| <b>Urine Color</b>        |                            |              |                |              |
| Slightly Yellow           | 2 (6.06 %)                 | 3 (9.09 %)   | 26 (78.79 %)   | 3 (9.09 %)   |
| Pale Yellow               | 28 (84.85 %)               | 22 (66.67 %) | 6 (18.18 %)    | 21 (53.53 %) |
| Straw                     | 3 (9.09%)                  | 4 (12.12 %)  | 0 (0.00 %)     | 5 (15.15 %)  |
| Yellow                    | 0 (0.00 %)                 | 4 (12.12 %)  | 91.20±27.32    | 4 (12.12 %)  |
| <b>Urine Transparency</b> |                            |              |                |              |
| Clear                     | 12 (36.36%)                | 21 (65.71 %) | 11(33.33 %)    | 27(81.82 %)  |
| Slightly Turbid           | 18 (54.54%)                | 11 (33.33 %) | 19 (57.57%)    | 4 (12.12 %)  |
| Turbid                    | 3 (9.09%)                  | 1 (3.03 %)   | 3 (9.09 %)     | 2 (6.06 %)   |
| <b>Specific Gravity</b>   | 1.02 ±0.01                 | 1.02 ±0.01   | 1.02 ±0.01     | 1.02 ±0.01   |
| <b>Protein</b>            |                            |              |                |              |
| Absent                    | 33 (100.00 %)              |              | 33 (100.00 %)  |              |
| Present                   | 0 (0.00 %)                 |              | 0 (0.00 %)     |              |
| <b>Ketone bodies</b>      |                            |              |                |              |
| Absent                    | 33 (100.00 %)              |              | 33 (100.00 %)  |              |
| Present                   | 0 (0.00 %)                 |              | 0 (0.00 %)     |              |

Data represents the Number of participants (%). None of the parameters showed any significant difference from baseline to end of the study in *B. coagulans* and the placebo groups.
